# Supplementary material
Source: Springer Nature journal article supplement (https://www.springermedizin.de/resource/supplementary/12874_2010_519_MOESM5_ESM.pdf/9432502)
Supplement: MOESM5 [file 9432502]

Advertisement-recruited bicycle commuters' sex-neutral mean scores for ratings of the suburban route environment

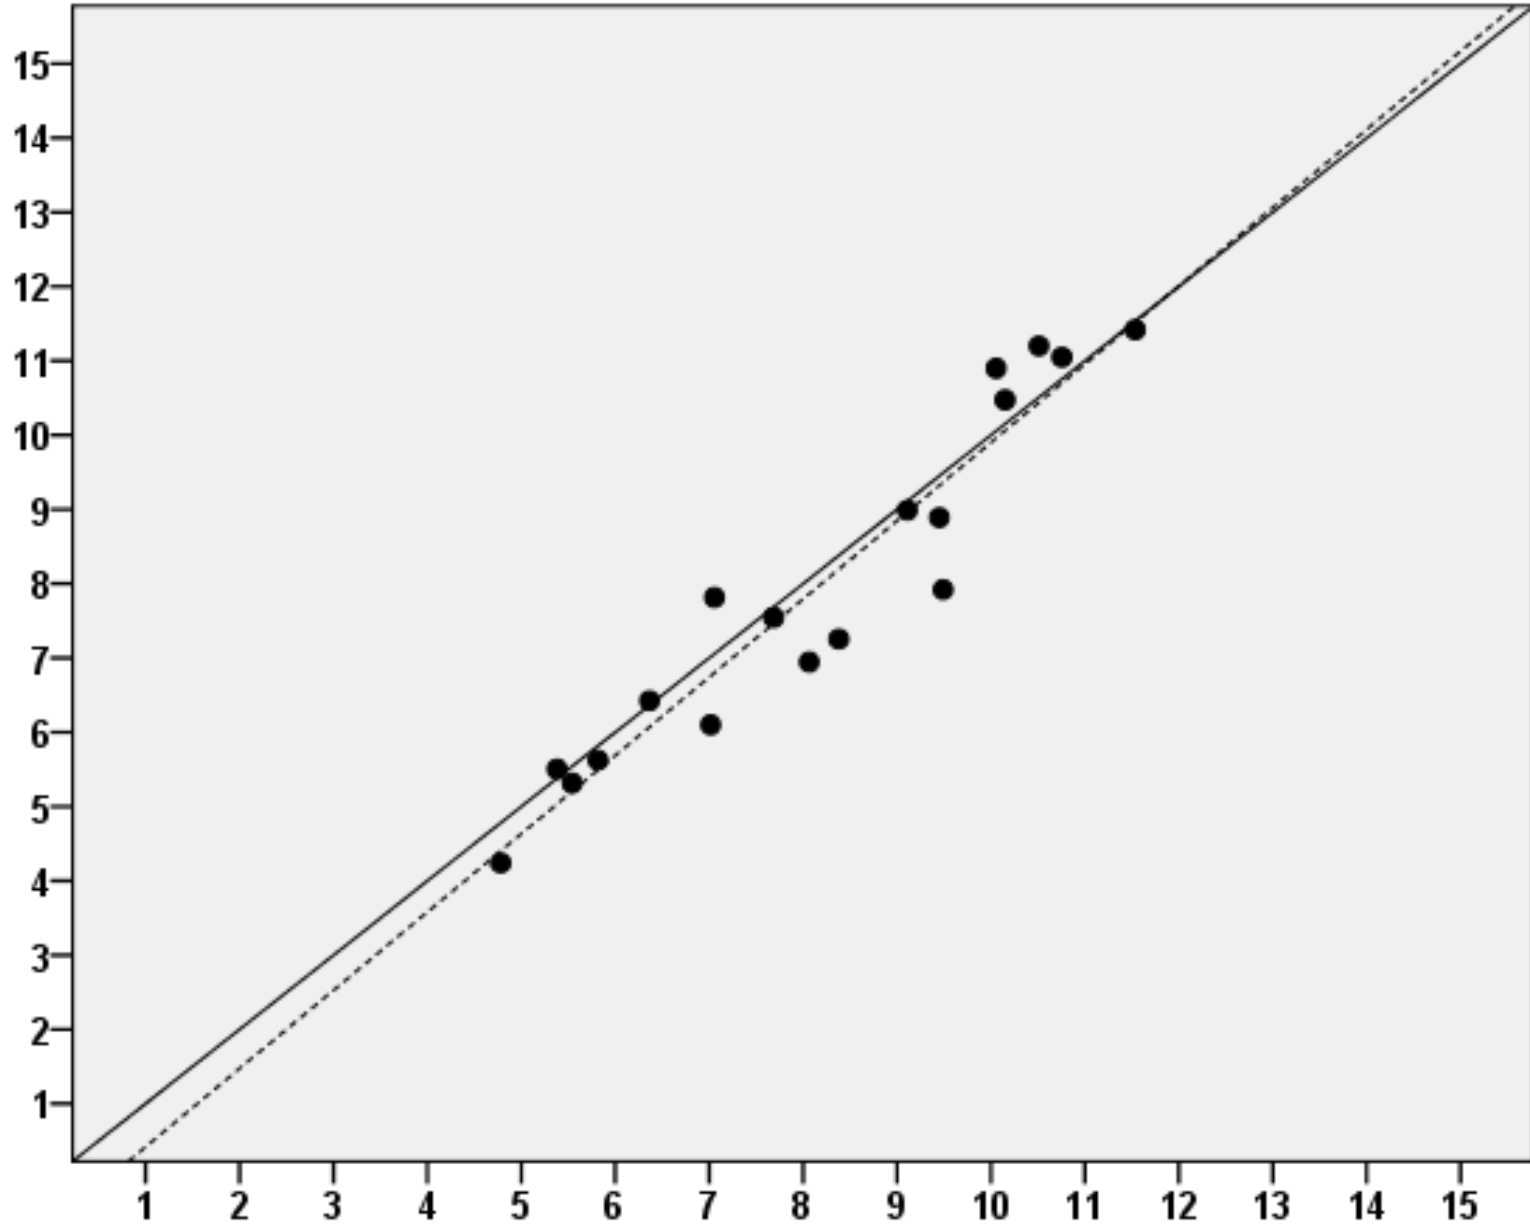

Street-recruited bicycle commuters' sex-neutral mean scores for ratings of the suburban route environments
